# Supplementary material for: Use of a 2-year continuing professional development programme to change Japanese physicians’ attitudes to learning primary care: a qualitative study
Source: HighWire-hosted journal article supplement (doi:10.1136/bmjopen-2021-059925), 2022-07-01
Supplement: bmjopen-2021-059925supp001_data_supplement.pdf [file bmjopen-2021-059925supp001_data_supplement.pdf]

**APPENDIX 1****Primary care themes covered in the Family Medicine Brush-up Program**

## I. Typical health problems in primary care

|                      |                        |                         |
|----------------------|------------------------|-------------------------|
| Child – old age care | Palliative care        | Women’s health          |
| Rehabilitation       | Mental health problems | Vaccination             |
| Chinese medicine     | Common emergencies     | Musculoskeletal problem |
| Surgery              | Ophthalmology          | Otorhinolaryngology     |

## II. The principles of family medicine

|                                   |                        |                                |
|-----------------------------------|------------------------|--------------------------------|
| Patient-centered clinical method  | Family-oriented care   |                                |
| Biopsychosocial model             | Interprofessional work |                                |
| Prevention and health promotion   | Ethics and law         | Patient-clinician relationship |
| Healthcare context and continuity | Behavior modification  |                                |
| Complexity and uncertainty        | Reflective learning    |                                |

## III. Interpersonal and communication skills

|                          |                                    |
|--------------------------|------------------------------------|
| Medical interview        | Laboratory tests in the clinic     |
| Clinical problem solving | Evidence-based medicine            |
| Professionalism          | Minorities and socially vulnerable |
| Facility management      | Practice guidelines                |
